# Supplementary material for: A colorimetric and “off–on” fluorescent Pd2+ chemosensor based on a rhodamine-ampyrone conjugate: synthesis, experimental and theoretical studies along with in vitro applications
Source: Royal Society of Chemistry journal article supplement (doi:10.1039/c8nj05194a), 2019-01-01
Supplement: c8nj05194a1.pdf [file c8nj05194a1.pdf]

## Electronic Supplementary Information (ESI†)

### Colorimetric and “off-on” fluorescent Pd<sup>2+</sup> chemosensor based on rhodamine-ampyrone conjugate: synthesis, experimental and theoretical studies along with *in vitro* applications

Sanchita Mondal,<sup>\*a</sup> Saikat Kumar Manna,<sup>\*b</sup> Sudipta Pathak,<sup>\*b</sup> Abdulla Al Masum<sup>c</sup> and Subrata Mukhopadhyaya<sup>a</sup>

<sup>a</sup>Department of Chemistry, Jadavpur University, Kolkata 700032, India.

<sup>b</sup>Department of Chemistry, Haldia Government College, Debhog, Purba Medinipur, West Bengal 721657, India.

<sup>c</sup>Department of Life Science & Bio-technology, Jadavpur University, Kolkata 700032, India.

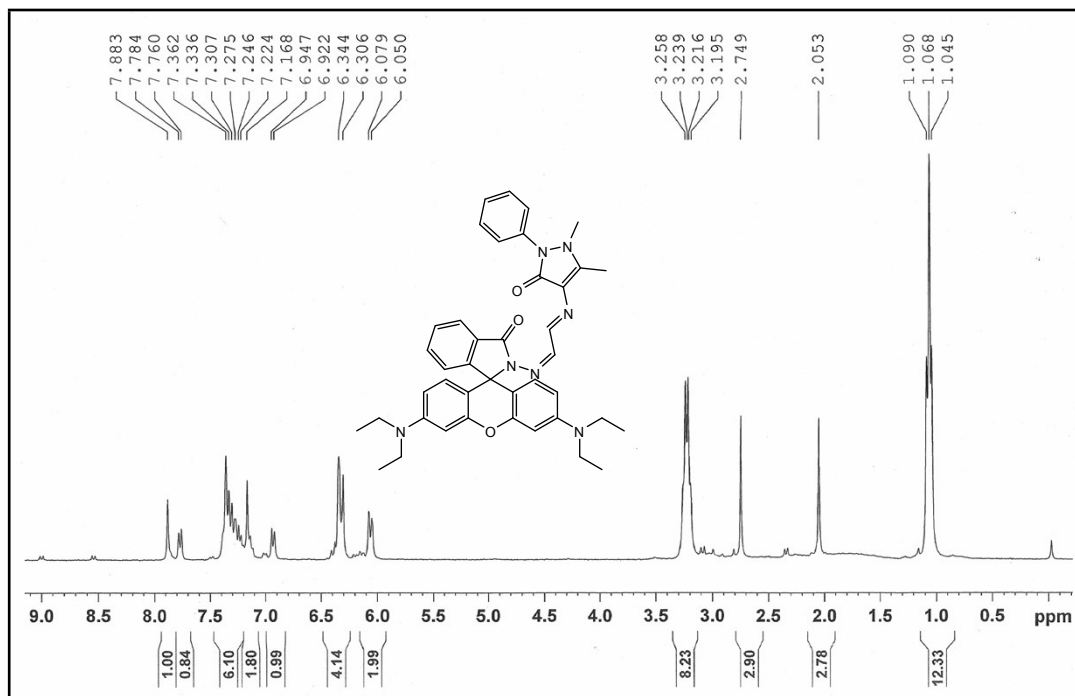

**Figure S1:**  $^1\text{H}$  NMR spectrum of compound L.

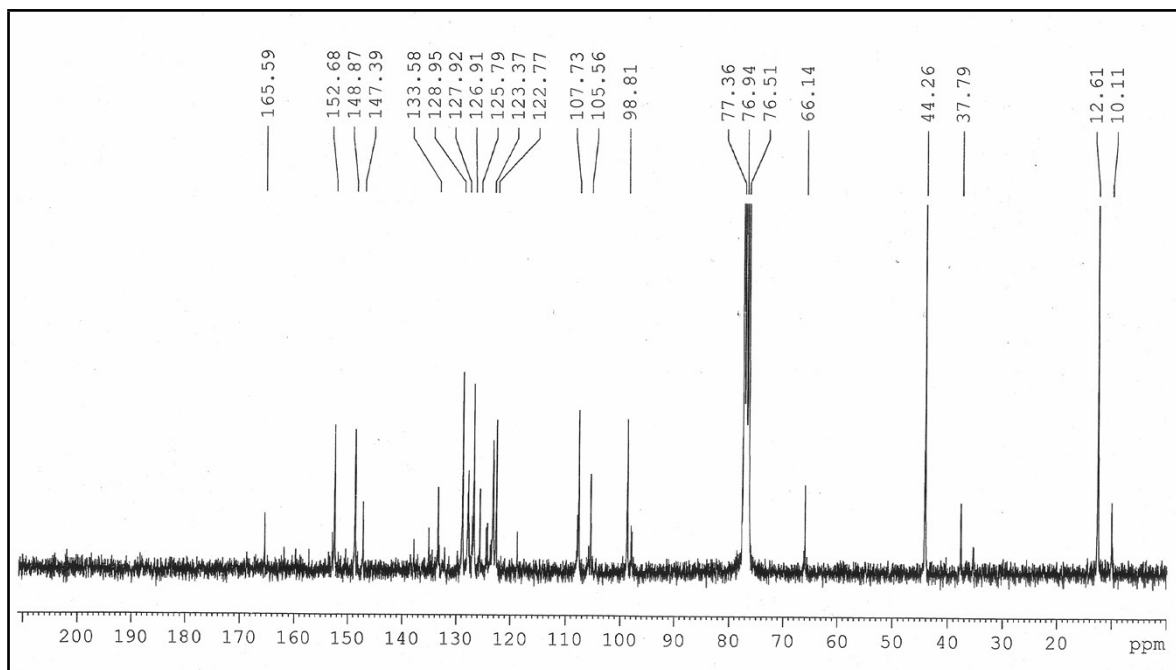

**Figure S2:**  $^{13}\text{C}$  NMR spectrum of chemosensor L.

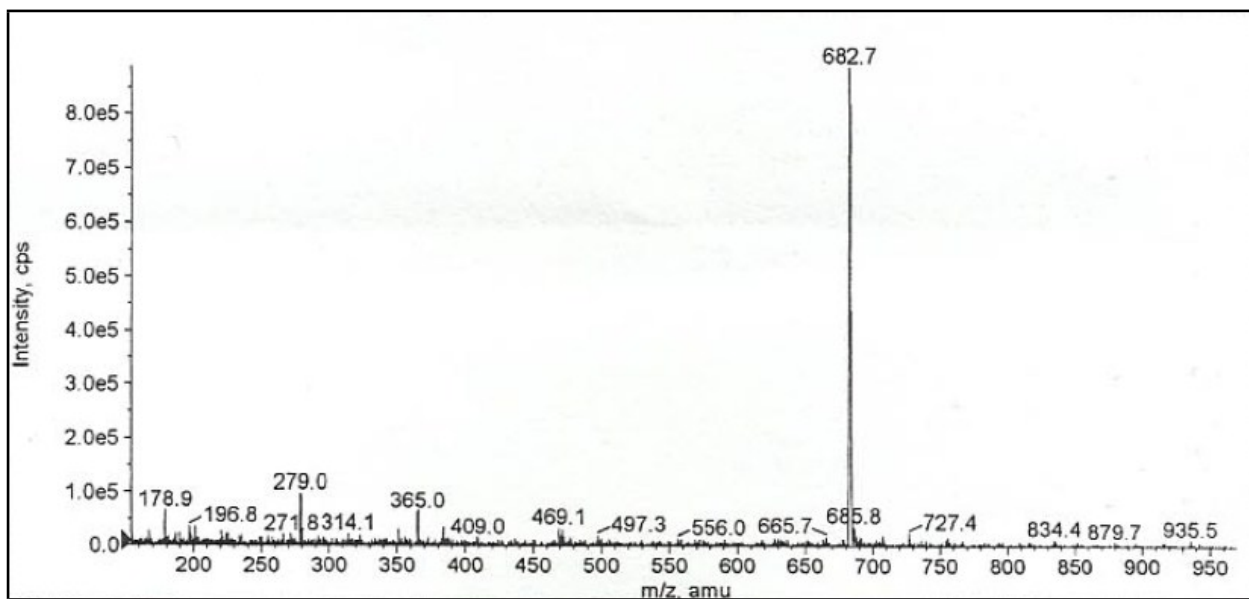

**Figure S3:** Mass spectrum of chemosensor L.

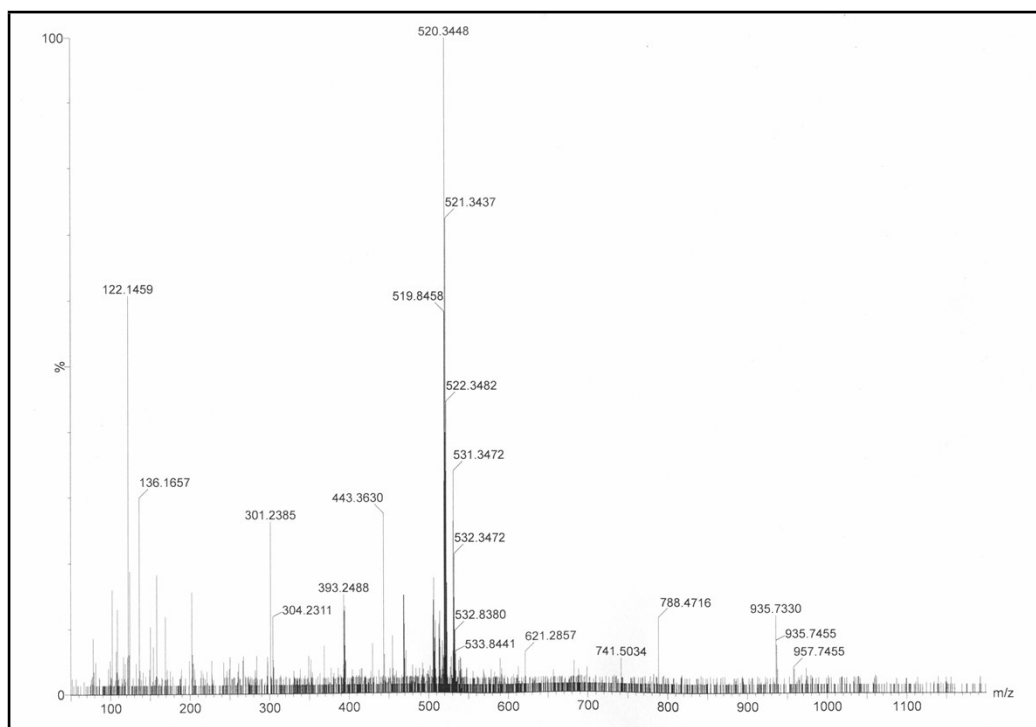

**Figure S4:** Mass spectrum of chemosensor L-Pd<sup>2+</sup> complex.

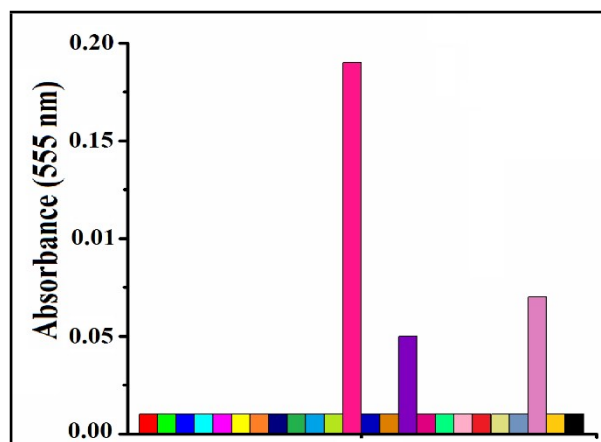

**Figure S5:** Change in the absorption spectrum of receptor **L** [ $c = 4 \times 10^{-5}$  M, CH<sub>3</sub>CN/H<sub>2</sub>O = 1 :1, v/v, 10 mM HEPES buffer, pH = 7.4) with respective metal cations ( $c = 4 \times 10^{-4}$  M, left to right- **L**, K<sup>+</sup>, Na<sup>+</sup>, Mg<sup>2+</sup>, Ca<sup>2+</sup>, Sr<sup>2+</sup>, Ba<sup>2+</sup>, Cr<sup>3+</sup>, Mn<sup>2+</sup>, Fe<sup>2+</sup>, Fe<sup>3+</sup>, Pd<sup>2+</sup>, Co<sup>2+</sup>, Ni<sup>2+</sup>, Cu<sup>2+</sup>, Zn<sup>2+</sup>, Cd<sup>2+</sup>, Pb<sup>2+</sup>, Hg<sup>2+</sup>, Pt<sup>2+</sup>, Pd<sup>0</sup>, Al<sup>3+</sup>, Ru<sup>3+</sup>, and Ag<sup>+</sup>).

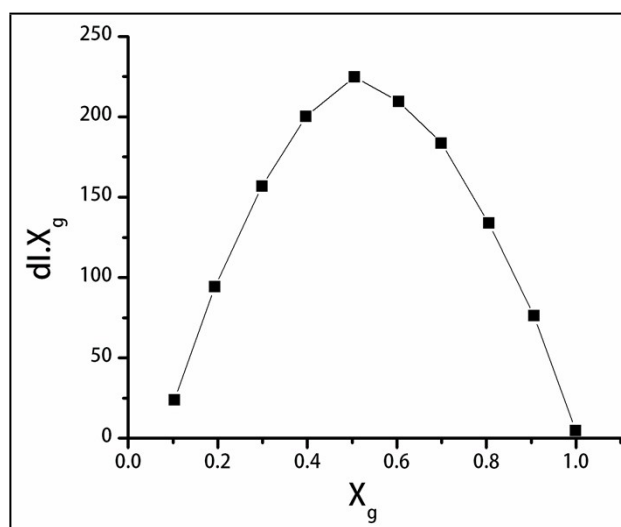

**Figure S6:** Fluorescence Job's plot for **L** with Pd<sup>2+</sup> in CH<sub>3</sub>CN/H<sub>2</sub>O solution (8:2, v/v, 10 mM HEPES buffer, pH 7.4). ([H] = [G] =  $4 \times 10^{-5}$  M).

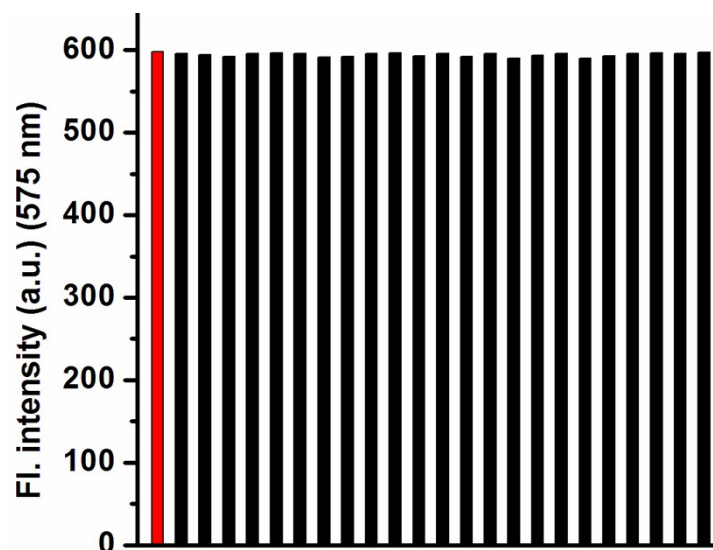

**Figure S7:** Fluorescence response of **L** ( $c = 1.0 \times 10^{-5}$  M) to 1.0 equiv addition of  $\text{Pd}^{2+}$  (the red bar portion) and to the mixture of 10 equiv. of other metal ions with 1.0 equiv. of  $\text{Pd}^{2+}$  (the black bar portion, left to right-  $\text{K}^+$ ,  $\text{Na}^+$ ,  $\text{Mg}^{2+}$ ,  $\text{Ca}^{2+}$ ,  $\text{Sr}^{2+}$ ,  $\text{Ba}^{2+}$ ,  $\text{Cr}^{3+}$ ,  $\text{Mn}^{2+}$ ,  $\text{Fe}^{2+}$ ,  $\text{Fe}^{3+}$ ,  $\text{Co}^{2+}$ ,  $\text{Ni}^{2+}$ ,  $\text{Cu}^{2+}$ ,  $\text{Zn}^{2+}$ ,  $\text{Cd}^{2+}$ ,  $\text{Pb}^{2+}$ ,  $\text{Hg}^{2+}$ ,  $\text{Pt}^{2+}$ ,  $\text{Pd}^0$ ,  $\text{Al}^{3+}$ ,  $\text{Ru}^{3+}$ , and  $\text{Ag}^+$ ).

### Calculation for Limit of Detection (LOD):

The LOD of **L** for  $\text{Pd}^{2+}$  was determined using the following equation:

$\text{LOD} = 3\text{Sb1}/\text{S}$ , Sb1 is the standard deviation of the blank solution; S is the slope of the calibration curve.

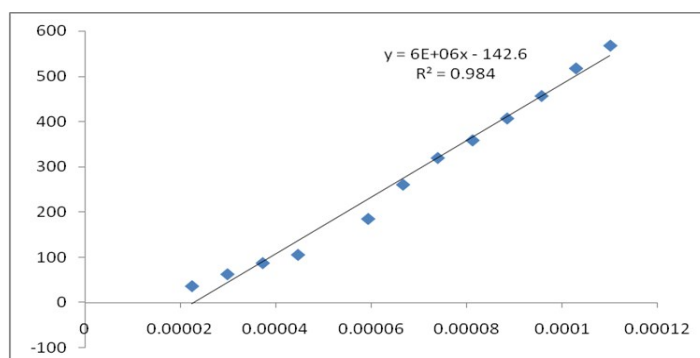

**Figure S8:** Calibration curve for fluorescence titration of **L** with  $\text{Pd}^{2+}$ .

From the graph we get slope (S) =  $6 \times 10^6$  Standard deviation (Sb1 = 23.81723)

Thus, using the formula, we get the  $\text{LOD} = 11.9 \times 10^{-6}$  M = 11.9  $\mu\text{M}$ .

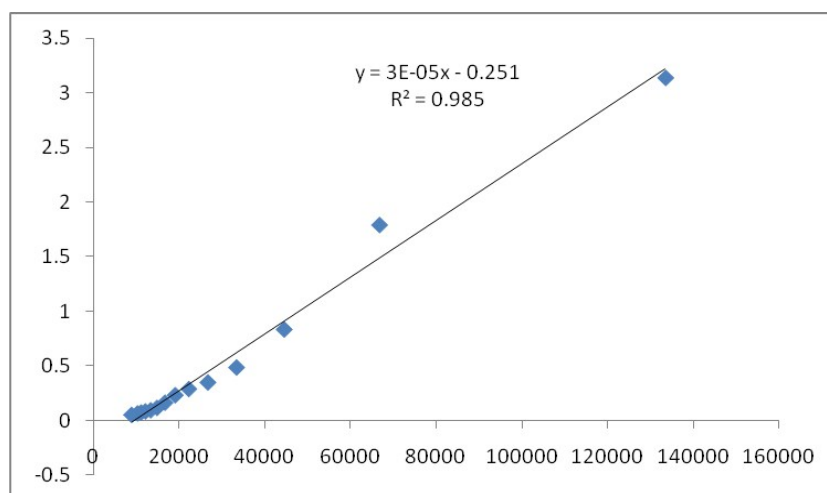

**Figure S9:** Bensei-Hildebrand plot obtained from the Fluorescence (emission calculated from 575 nm) studies. Binding constant ( $K_a = 8.36 \times 10^3 \text{ M}^{-1}$ ) curve of sensor **L** with  $\text{Pd}^{2+}$  determined by fluorescence method.

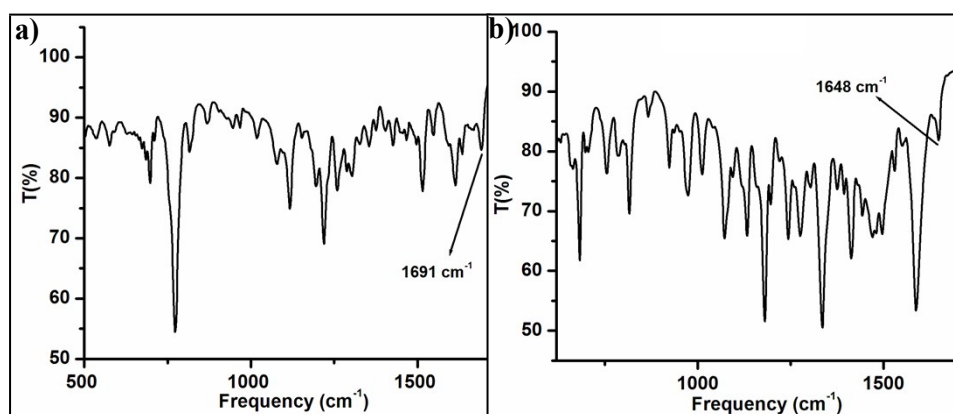

**Figure S10:** FTIR spectra of (a) **L** and (b) **L-Pd<sup>2+</sup>** complex.

### Theoretical study:

**Table S1.** HOMO-LUMO energy calculated for **L1** and **L1-2Zn<sup>2+</sup>** complex using [(B3LYP/6-311G(d,p)] for **L** and B3LYP/LanL2DZ for **L-Pd<sup>2+</sup>** for level of theory)

| Species                  | E(HOMO)  | E(LUMO)  | $\Delta E$ (Hartree) | $\Delta E$ (eV) | $\Delta E$ (kcal/mol) |
|--------------------------|----------|----------|----------------------|-----------------|-----------------------|
| <b>L</b>                 | -0.18937 | -0.06438 | 0.12499              | 3.401           | 78.43                 |
| <b>L-Pd<sup>2+</sup></b> | -0.35355 | -0.30237 | 0.05118              | 1.3927          | 32.11                 |

1 Hartree = 27.2116 eV, 1 Hartree = 627.5095 kcal mol<sup>-1</sup>

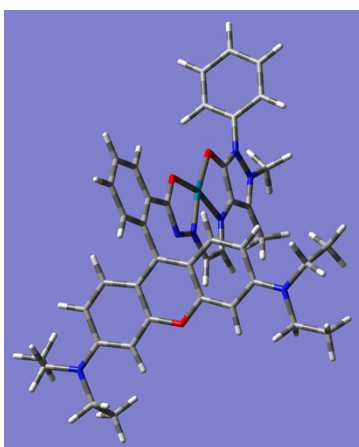

**Figure S11:** Energy-minimized structure of **L-Pd<sup>2+</sup>** complex (atom color: gray = C, red = O, blue = N, white = H, teal blue = Pd).

**Table S2:** Selected bond length and bond angles in B3LYP/LanL2DZ optimized geometry of **L-Pd<sup>2+</sup>**.

| Bond                       | Bond length (Å) |
|----------------------------|-----------------|
| Pd-O (rhodamine carbonyl)  | 2.09            |
| Pd-N (rhodamine imino)     | 1.96            |
| Pd-O (antipyrine carbonyl) | 2.16            |
| Pd-N (antipyrine inamine)  | 2.02            |

|               |                                                                                     |                                                                                       |
|---------------|-------------------------------------------------------------------------------------|---------------------------------------------------------------------------------------|
| <b>LUMO+2</b> | 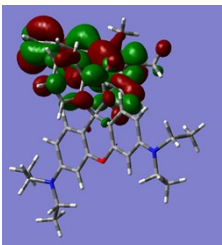   |    |
| <b>LUMO+1</b> |    |    |
| <b>LUMO</b>   |    |    |
| <b>HOMO</b>   |   |   |
| <b>HOMO-1</b> |  |  |
| <b>HOMO-2</b> |  |  |
| <b>L</b>      |                                                                                     | <b>L-Pd<sup>2+</sup></b>                                                              |

**Figure S12:** Molecular orbital plots of **L** and **L-Pd<sup>2+</sup>**.



### Cell imaging study:

**Minimum Inhibitory Concentration (MIC):** We have treated probe **L** with both gram positive and gram-negative bacteria. After 24 hrs. of treatment probe **L** shows no effect on gram negative bacteria but it showed some effect on gram positive bacteria. Probe **L** showed bactericidal activity on 100  $\mu\text{M}$ .

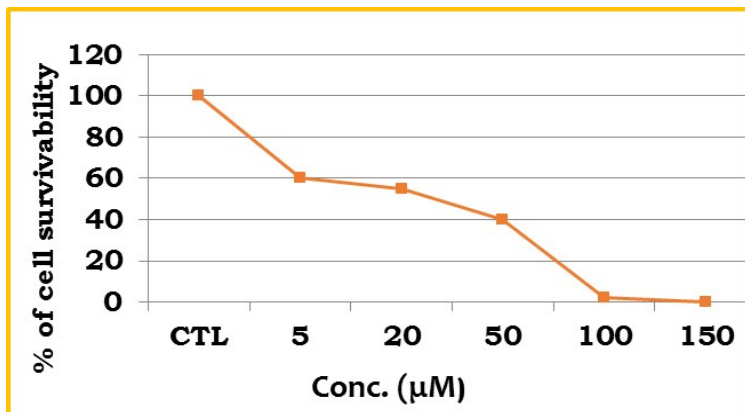

**Figure S13:** Minimum inhibitory concentration of compound against gram positive bacteria.

**Cell Survivability Assay:** Probe **L** showed cytotoxicity against MDA-MB 468 cells when treated with different concentrations 0 - 150  $\mu\text{M}$  for 24 hrs and cell survivability was determined by MTT assay. As seen in Figure S14 cell survivability decreased with increasing concentration of probe **L**. From the graph we also calculated  $\text{LD}_{50}$  and found that the value was 50  $\mu\text{M}$  approx. for the probe **L**.

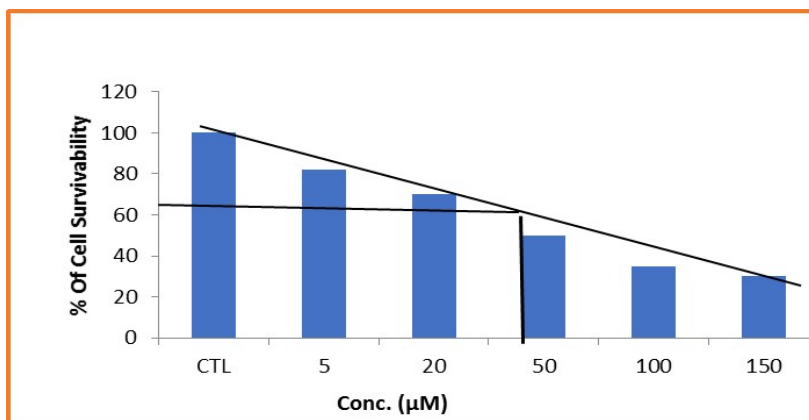

**Figure S14:** Cytotoxic effect of probe **L** on MDA-MB-468 cells. Cells were incubated with increasing concentrations probe **L** and its survivability was assessed by MTT assay.

**Table S3.** Summary of representative fluorescent probes for Pd<sup>2+</sup>

| Sl. No. | Chemical Structure                                                                                                                                                 | Media                                                                         | Pd <sup>2+</sup> limit of detection   | Biological application                                                             |
|---------|--------------------------------------------------------------------------------------------------------------------------------------------------------------------|-------------------------------------------------------------------------------|---------------------------------------|------------------------------------------------------------------------------------|
| 1.      | <p><b>Our Work</b></p> 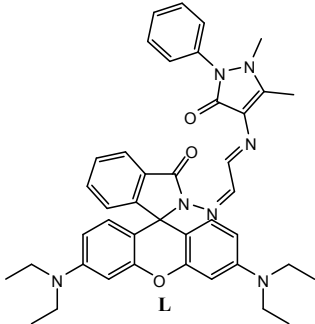 <p style="text-align: center;"><b>L</b></p>               | CH <sub>3</sub> CN/H <sub>2</sub> O<br>(4:1, v/v, 10 mM HEPES buffer, pH 7.4) | 11.9 μM                               | Our chemosensor can detect intracellular Pd <sup>2+</sup> ion in MDA-MB-468 cells. |
| 2.      |  <p style="text-align: center;">(Tetrahedron, 2014, <b>70</b>, 1997-2002)</p>     | DMF/H <sub>2</sub> O<br>(v/v, 7/1)                                            | 7.32 ppb<br>(5.53 μM)* <sup>1</sup>   | Not mentioned                                                                      |
| 3.      |  <p style="text-align: center;">(Chem. Commun., 2008, 6339-6341)</p>            | Ethanol-water<br>(60 : 40, v/v)<br>solution at pH 7.2                         | Not mentioned                         | Not mentioned                                                                      |
| 4.      |  <p style="text-align: center;">(Chem. Commun., 2011, <b>47</b>, 9101-9103)</p> | EtOH-H <sub>2</sub> O (1 : 1, v/v, 25 1C) at pH 7.2 (50 mM HEPES buffer)      | Not mentioned                         | Not mentioned                                                                      |
| 5.      |  <p style="text-align: center;">(Dalton Trans., 2014, <b>43</b>, 4626-4630)</p> | EtOH-H <sub>2</sub> O (1 : 1, v/v)                                            | 73.8 nM<br>(0.0738 μM) * <sup>2</sup> | Not mentioned                                                                      |

|    |                                                                                                                                                      |                                                          |                                                                              |               |
|----|------------------------------------------------------------------------------------------------------------------------------------------------------|----------------------------------------------------------|------------------------------------------------------------------------------|---------------|
| 6. | 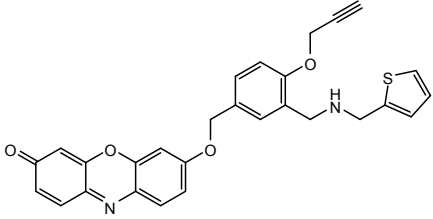 <p>(<i>Sens. Actuators, B</i> 2012, <b>171–172</b>, 1277–1282)</p> | MeOH/PBS<br>(pH = 7.4, 10<br>mM) solution<br>(8:2, v:v), | 0.05 $\mu\text{M}^{*3}$                                                      | Not mentioned |
| 7. |  <p>(<i>Sens. Actuators, B</i> 2012, <b>171–172</b>, 508–514)</p>   | HAc–NaAc<br>buffer<br>solution (pH =<br>4.7)             | 0.13 $\mu\text{M}^{*4}$                                                      | Not mentioned |
| 8. |  <p>(<i>Tetrahedron</i> 2011, <b>67</b>, 7106-7113)</p>            | MeCN/DMSO<br>(99:1)                                      | Not<br>mentioned                                                             | Not mentioned |
| 9. |  <p>(<i>Chem. Commun.</i>, 2013, <b>49</b>, 822-824)</p>          | Ethanol–water<br>(4 : 1, v/v),                           | 1.49 $\times 10^{-9}$<br>M<br>(1.49 $\times 10^{-3}$<br>$\mu\text{M}^{*5}$ ) | Not mentioned |

|     |                                                                                                                                                |                                                                                     |                    |               |
|-----|------------------------------------------------------------------------------------------------------------------------------------------------|-------------------------------------------------------------------------------------|--------------------|---------------|
| 10. | 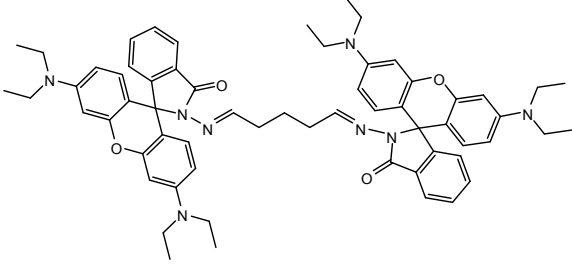 <p>(<i>Analyst</i>, 2017, <b>142</b>, 1536–1544)</p>         | CH <sub>3</sub> CN : H <sub>2</sub> O<br>(3 : 2 v/v)                                | 1 μM* <sup>6</sup> | Not mentioned |
| 11. |  <p>(<i>Tetrahedron Lett.</i> 2012, <b>53</b>, 3459–3462)</p> | PBS (20 mM,<br>pH 7.4)<br>solution<br>containing<br>10% (v:v)<br>CH <sub>3</sub> CN | Not<br>mentioned   | Not mentioned |

\*<sup>1</sup> Molecular weight of fluorophore is too high compared to **L (our work)**. Thus, it is less important with respect to atom economy though its limit of detection is less than **L**

\*<sup>2</sup> Overall yield of reported compound formation (37% in last step) is low compared to the synthesis of **L**.

\*<sup>3</sup> The number of steps for the synthesis of fluorescent probe is more and some of the steps are low yielding (24%-75%).

\*<sup>4</sup> Experiments were carried out at acidic condition (pH = 4.7). But biological pH is generally close to neutral. Thus, this method has much lower significance for Pd<sup>2+</sup> contaminated cell.

\*<sup>5</sup> Final step is low yielding (25%).

\*<sup>6</sup> Yield of the final step is not high (55%). Due to large size of the molecule, it is less important in terms of atom economy too.

\*<sup>1-6</sup> None of the tabulated methods above, except ours, were silent about their applications on living cells.
